# Supplementary material for: TMEM16A in smooth muscle cells acts as a pacemaker channel in the internal anal sphincter
Source: PubMed Central journal article supplement (PMC10844222; doi:10.1038/s42003-024-05850-1), 2024-02-05
Supplement: 42003_2024_5850_MOESM3_ESM.pdf [file 42003_2024_5850_MOESM3_ESM.pdf]

## **Description of Additional Supplementary Files**

**File name:** Supplementary Data 1

**Description:** This Excel file is the source data containing all the data presented in both the main and supplementary figures.

**File name:** Supplementary Movie 1

**Description:** Calcium waves originate from three pacemakers in the IAS slice, as shown in Fig. 2. Image acquisition speed: 11 Hz, and video playback speed: 33 Hz.
